# Supplementary material for: Health promotion in schools: a multi-method evaluation of an Australian School Youth Health Nurse Program
Source: PubMed Central journal article supplement (PMC4416321; doi:10.1186/s12912-015-0071-0), 2015-04-22
Supplement: 12912_2015_71_MOESM1_ESM.pdf [file 12912_2015_71_MOESM1_ESM.pdf]

| <b>Question area</b>                                          | <b>RE-AIM dimension</b>       | <b>Participants</b>                             |
|---------------------------------------------------------------|-------------------------------|-------------------------------------------------|
| Strategies used to promote the program                        | Reach, Adoption               | Nurses<br>School staff<br>External stakeholders |
| Development of role                                           | Reach, Implementation         | Nurse                                           |
| Impact on youth health and wellbeing                          | Effectiveness                 | School staff<br>Government stakeholders         |
| Impact on external organisations                              | Effectiveness                 | External stakeholders                           |
| School staff members involved with program                    | Adoption                      | Nurses<br>School staff                          |
| External organisations supporting program                     | Adoption                      | Nurses<br>External stakeholders                 |
| Barriers to reach and adoption                                | Reach, Adoption               | Nurses<br>School staff<br>External stakeholders |
| Enablers to reach and adoption                                | Reach, Adoption               | Nurses<br>School staff<br>External stakeholders |
| Program development                                           | Implementation                | Government stakeholders                         |
| Program implementation according to guidelines                | Implementation                | Nurses<br>Government stakeholders               |
| Balance between individual, group and whole school activities | Implementation, Maintenance   | Nurses<br>School staff                          |
| Problems with implementation                                  | Implementation                | Nurses<br>Government stakeholders               |
| Areas that need improvement to increase effectiveness         | Implementation                | Nurses<br>School staff<br>External stakeholders |
| Areas that work well                                          | Effectiveness, Implementation | Nurses<br>School staff<br>External stakeholders |
| Integration into schools                                      | Maintenance                   | School staff<br>Government stakeholders         |
| Processes for quality improvement                             | Maintenance                   | Nurses                                          |

|                                                                |             |                         |
|----------------------------------------------------------------|-------------|-------------------------|
| and sustainability                                             |             | Government stakeholders |
| Opportunities for further education, mentoring and supervision | Maintenance | Nurses                  |
| Satisfaction with role (interview)                             | Maintenance | Nurses                  |
